# Supplementary material for: Food-Insecure Household’s Self-Reported Perceptions of Food Labels, Product Attributes and Consumption Behaviours
Source: Nutrients. 2019 Apr 12;11(4):828. doi: 10.3390/nu11040828 (PMC6521285; doi:10.3390/nu11040828)
Supplement: Supplementary file 1 [file nutrients-11-00828-s001.pdf]

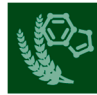

Table S1: Response, by three categories of food security, frequencies and proportions for a single consumption and food label indicators

| Outcome                                                                                                                    | Category                   | High-Marginal Food Security | Low Food Security | Very Low Food Security |
|----------------------------------------------------------------------------------------------------------------------------|----------------------------|-----------------------------|-------------------|------------------------|
| I read the ingredients and nutrition information on the back of the food package                                           | Agree                      | 392 (59%)                   | 110 (53%)         | 94 (53%)               |
|                                                                                                                            | Neither agree nor disagree | 161 (24%)                   | 67 (23%)          | 48 (27%)               |
|                                                                                                                            | Disagree                   | 115 (17%)                   | 30 (14%)          | 35 (20%)               |
| I understand the information provided on the back of food packages                                                         | Agree                      | 439 (66%)                   | 100 (48%)         | 82 (46%)               |
|                                                                                                                            | Neither agree nor disagree | 168 (25%)                   | 82 (40%)          | 55 (31%)               |
|                                                                                                                            | Disagree                   | 61 (9%)                     | 25 (12%)          | 40 (23%)               |
| I take notice of the nutritional claims on the front of food packaging. e.g. low fat, high calcium, high fibre, diet, lite | Agree                      | 394 (59%)                   | 108 (52%)         | 89 (50%)               |
|                                                                                                                            | Neither agree nor disagree | 150 (22%)                   | 65 (31%)          | 51 (29%)               |
|                                                                                                                            | Disagree                   | 124 (19%)                   | 34 (16%)          | 37 (21%)               |
| I still read the nutritional information and ingredients on the back of the package if there is a claim on the front       | Agree                      | 413 (62%)                   | 112 (54%)         | 97 (55%)               |
|                                                                                                                            | Neither agree nor disagree | 144 (21%)                   | 58 (28%)          | 46 (26%)               |
|                                                                                                                            | Disagree                   | 111 (17%)                   | 37 (18%)          | 34 (19%)               |
| I prefer to buy food that carries a nutritional claim on the front of the package                                          | Agree                      | 165 (25%)                   | 58 (28%)          | 49 (28%)               |
|                                                                                                                            | Neither agree nor disagree | 320 (48%)                   | 106 (51%)         | 77 (44%)               |
|                                                                                                                            | Disagree                   | 183 (27%)                   | 43 (21%)          | 51 (29%)               |
| The ingredients and nutritional information on the back of the package does not influence my purchasing decisions          | Agree                      | 160 (27%)                   | 68 (33%)          | 41 (23%)               |
|                                                                                                                            | Neither agree nor disagree | 178 (27%)                   | 70 (34%)          | 69 (39%)               |
|                                                                                                                            | Disagree                   | 330 (49%)                   | 69 (33%)          | 67 (38%)               |
| The nutrition information offers useful information about the product                                                      | Agree                      | 475 (71%)                   | 124 (60%)         | 98 (55%)               |
|                                                                                                                            | Neither agree nor disagree | 166 (25%)                   | 70 (34%)          | 59 (34%)               |
|                                                                                                                            | Disagree                   | 27 (4%)                     | 13 (6%)           | 20 (11%)               |
| There is too much nutritional information on food packaging                                                                | Agree                      | 109 (16%)                   | 38 (19%)          | 50 (28%)               |
|                                                                                                                            | Neither agree nor disagree | 241 (36%)                   | 102 (49%)         | 58 (33%)               |
|                                                                                                                            | Disagree                   | 318 (48%)                   | 67 (32%)          | 69 (39%)               |
| I never read the nutritional information and ingredients on food packages                                                  | Agree                      | 81 (12%)                    | 33 (16%)          | 32 (18%)               |
|                                                                                                                            | Neither agree nor disagree | 118 (18%)                   | 76 (37%)          | 54 (31%)               |
|                                                                                                                            | Disagree                   | 469 (70%)                   | 98 (47%)          | 91 (51%)               |
| How healthy would you say your diet was?                                                                                   | Healthy                    | 540 (83%)                   | 154 (76%)         | 111 (65%)              |
|                                                                                                                            | Unhealthy                  | 109 (17%)                   | 50 (25%)          | 60 (35%)               |

Table S2: Response, by three categories of food security, frequencies and proportions for nutrition claim indicators

| Outcome                                       | Category                          | High-Marginal Food Security | Low Food Security | Very Low Food Security |
|-----------------------------------------------|-----------------------------------|-----------------------------|-------------------|------------------------|
| Rate the importance of the nutritional claim: | Important                         | 381 (57%)                   | 123 (59%)         | 94 (53%)               |
| Low calorie (kilojoule)                       | Neither important nor unimportant | 186 (28%)                   | 56 (27%)          | 60 (34%)               |
|                                               | Unimportant                       | 101 (15%)                   | 28 (14%)          | 23 (13%)               |
| Rate the importance of the nutritional claim: | Important                         | 337 (50%)                   | 118 (57%)         | 98 (55%)               |
| High protein                                  | Neither important nor unimportant | 235 (35%)                   | 69 (33%)          | 64 (36%)               |
|                                               | Unimportant                       | 96 (14%)                    | 20 (20%)          | 15 (9%)                |
| Rate the importance of the nutritional claim: | Important                         | 470 (70%)                   | 143 (69%)         | 122 (69%)              |
| Low saturated fats                            | Neither important nor unimportant | 132 (20%)                   | 46 (22%)          | 41 (23%)               |
|                                               | Unimportant                       | 66 (10%)                    | 18 (9%)           | 14 (8%)                |
| Rate the importance of the nutritional claim: | Important                         | 309 (46%)                   | 107 (52%)         | 96 (54%)               |
| Low carbohydrates                             | Neither important nor unimportant | 252 (38%)                   | 70 (34%)          | 62 (35%)               |
|                                               | Unimportant                       | 107 (16%)                   | 30 (15%)          | 19 (11%)               |
| Rate the importance of the nutritional claim: | Important                         | 443 (66%)                   | 134 (65%)         | 109 (62%)              |
| Low sodium                                    | Neither important nor unimportant | 162 (24%)                   | 51 (0.25%)        | 51 (29%)               |
|                                               | Unimportant                       | 63 (9%)                     | 22 (11%)          | 17 (10%)               |
| Rate the importance of the nutritional claim: | Important                         | 486 (73%)                   | 150 (73%)         | 125 (71%)              |
| Low sugar                                     | Neither important nor unimportant | 135 (20%)                   | 38 (18%)          | 36 (20%)               |
|                                               | Unimportant                       | 47 (7%)                     | 19 (9%)           | 16 (9%)                |
| Rate the importance of the nutritional claim: | Important                         | 329 (49%)                   | 109 (53%)         | 91 (51%)               |
| Low glycemic index                            | Neither important nor unimportant | 235 (35%)                   | 78 (37%)          | 63 (36%)               |
|                                               | Unimportant                       | 104 (16%)                   | 20 (10%)          | 23 (13%)               |
| Rate the importance of the nutritional claim: | Important                         | 429 (64%)                   | 138 (66%)         | 117 (66%)              |
| Low preservatives                             | Neither important nor unimportant | 180 (27%)                   | 59 (29%)          | 49 (28%)               |
|                                               | Unimportant                       | 59 (9%)                     | 10 (5%)           | 11 (6%)                |

Table S3: Response, by three categories of food security frequencies and proportions for product attribute indicators

| Outcome                                                                                                   | Category                          | High-Marginal Food Security | Low Food Security | Very Low Food Security |
|-----------------------------------------------------------------------------------------------------------|-----------------------------------|-----------------------------|-------------------|------------------------|
| Nutrition                                                                                                 | Important                         | 583 (87%)                   | 161 (79%)         | 138 (78%)              |
|                                                                                                           | Neither important nor unimportant | 66 (10%)                    | 37 (18%)          | 32 (18%)               |
|                                                                                                           | Unimportant                       | 18 (3%)                     | 7 (3%)            | 7 (4%)                 |
| Quality                                                                                                   | Important                         | 633 (95%)                   | 181 (88%)         | 155 (87%)              |
|                                                                                                           | Neither important nor unimportant | 27 (4%)                     | 19 (9%)           | 17 (10%)               |
|                                                                                                           | Unimportant                       | 7 (1%)                      | 5 (3%)            | 5 (3%)                 |
| Cost                                                                                                      | Important                         | 561 (84%)                   | 181 (88%)         | 159 (90%)              |
|                                                                                                           | Neither important nor unimportant | 84 (13%)                    | 17 (8%)           | 12 (7%)                |
|                                                                                                           | Unimportant                       | 22 (3%)                     | 7 (4%)            | 6 (3%)                 |
| In season                                                                                                 | Important                         | 478 (72%)                   | 141 (69%)         | 129 (73%)              |
|                                                                                                           | Neither important nor unimportant | 150 (23%)                   | 47 (23%)          | 37 (21%)               |
|                                                                                                           | Unimportant                       | 39 (5%)                     | 17 (8%)           | 11 (6%)                |
| Local products                                                                                            | Important                         | 454 (68%)                   | 133 (65%)         | 117 (66%)              |
|                                                                                                           | Neither important nor unimportant | 172 (26%)                   | 54 (26%)          | 40 (23%)               |
|                                                                                                           | Unimportant                       | 41 (6%)                     | 18 (9%)           | 20 (11%)               |
| Organic                                                                                                   | Important                         | 170 (26%)                   | 69 (34%)          | 60 (34%)               |
|                                                                                                           | Neither important nor unimportant | 254 (38%)                   | 81 (40%)          | 62 (35%)               |
|                                                                                                           | Unimportant                       | 243 (36%)                   | 55 (27%)          | 55 (31%)               |
| Raw food (natural state)                                                                                  | Important                         | 297 (45%)                   | 104 (51%)         | 81 (46%)               |
|                                                                                                           | Neither important nor unimportant | 241 (36%)                   | 72 (35%)          | 54 (30%)               |
|                                                                                                           | Unimportant                       | 129 (19%)                   | 29 (14%)          | 42 (24%)               |
| Unprocessed                                                                                               | Important                         | 356 (54%)                   | 108 (53%)         | 94 (53%)               |
|                                                                                                           | Neither important nor unimportant | 229 (34%)                   | 74 (36%)          | 54 (31%)               |
|                                                                                                           | Unimportant                       | 82 (12%)                    | 23 (11%)          | 29 (16%)               |
| Convenience (pre-packaged to save time) e.g.<br>pre-cut vegetables, pre-marinated meats, bottle<br>sauces | Important                         | 176 (26%)                   | 80 (39%)          | 60 (34%)               |
|                                                                                                           | Neither important nor unimportant | 205 (31%)                   | 74 (36%)          | 69 (39%)               |
|                                                                                                           | Unimportant                       | 286 (43%)                   | 51 (25%)          | 48 (27%)               |

| Outcome                                       | Category                          | High-Marginal Food Security | Low Food Security | Very Low Food Security |
|-----------------------------------------------|-----------------------------------|-----------------------------|-------------------|------------------------|
| Australian grown                              | Important                         | 504 (76%)                   | 153 (75%)         | 124 (70%)              |
|                                               | Neither important nor unimportant | 120 (18%)                   | 36 (18%)          | 37 (21%)               |
|                                               | Unimportant                       | 43 (6%)                     | 16 (8%)           | 16 (9%)                |
| Supermarket branded (homebrand, Coles Select) | Important                         | 111 (17%)                   | 75 (37%)          | 60 (34%)               |
|                                               | Neither important nor unimportant | 325 (49%)                   | 99 (49%)          | 75 (43%)               |
|                                               | Unimportant                       | 231 (35%)                   | 31 (15%)          | 42 (24%)               |

Table S4: Response, by three categories of food security p-values and odds ratios of single consumption and food label indicators

| Outcome                                                                                                                             | Category                   | Overall<br>Significance<br><sup>a</sup> | Post hoc analysis                           |          |                                        |         |                                                 |         |
|-------------------------------------------------------------------------------------------------------------------------------------|----------------------------|-----------------------------------------|---------------------------------------------|----------|----------------------------------------|---------|-------------------------------------------------|---------|
|                                                                                                                                     |                            |                                         | High-Marginal vs. Very Low Food<br>Security |          | High-Marginal vs. Low Food<br>Security |         | Low Food Security vs. Very Low<br>Food Security |         |
|                                                                                                                                     |                            |                                         | OR (95% CI)                                 | p-value  | OR (95% CI)                            | p-value | OR (95% CI)                                     | p-value |
| I read the ingredients and<br>nutrition information on the back<br>of the food package                                              | Agree                      | 0.089                                   | 1.00 (0.63,1.61)                            | 0.992    | 0.76 (0.48,1.22)                       | 0.263   | 1.31 (0.74,2.33)                                | 0.355   |
|                                                                                                                                     | Neither agree nor disagree |                                         | 0.75 (0.44,1.27)                            | 0.286    | 0.516 (0.31, 0.86)                     | 0.012*  | 1.45 (0.77,2.72)                                | 0.248   |
|                                                                                                                                     | Disagree                   |                                         | 1.00 (ref)                                  |          | 1.00 (ref)                             |         | 1.00 (ref)                                      |         |
| I understand the information<br>provided on the back of food<br>packages                                                            | Agree                      | <0.001**                                | 2.83(1.72, 4.66)                            | <0.001** | 1.46 (0.86, 2.49)                      | 0.146   | 1.93(1.07, 3.51)                                | 0.030*  |
|                                                                                                                                     | Neither agree nor disagree |                                         | 1.67 (0.98, 2.86)                           | 0.062    | 0.73 (0.42,1.27)                       | 0.261   | 2.29(1.23, 4.26)                                | 0.009** |
|                                                                                                                                     | Disagree                   |                                         | 1.00 (ref)                                  |          | 1.00 (ref)                             |         | 1.00 (ref)                                      |         |
| I take notice of the nutritional<br>claims on the front of food<br>packaging. e.g. low fat, high<br>calcium, high fibre, diet, lite | Agree                      | 0.216                                   | 1.189 (0.75, 1.89)                          | 0.464    | 0.91 (0.58,1.42)                       | 0.669   | 1.311 (0.75,2.29)                               | 0.339   |
|                                                                                                                                     | Neither agree nor disagree |                                         | 0.857 (0.51, 1.44)                          | 0.559    | 0.64 (0.39,1.05)                       | 0.074   | 1.345 (0.73,2.47)                               | 0.338   |
|                                                                                                                                     | Disagree                   |                                         | 1.00 (ref)                                  |          | 1.00 (ref)                             |         | 1.00 (ref)                                      |         |
| I still read the nutritional<br>information and ingredients on<br>the back of the package if there is<br>a claim on the front       | Agree                      | 0.313                                   | 1.079 (0.67,1.74)                           | 0.754    | 0.99 (0.63,1.55)                       | 0.973   | 1.088 (0.623, 1.90)                             | 0.767   |
|                                                                                                                                     | Neither agree nor disagree |                                         | 0.791 (0.457, 1.37)                         | 0.402    | 0.68 (0.41,1.13)                       | 0.139   | 1.161 (0.619, 2.18)                             | 0.642   |
|                                                                                                                                     | Disagree                   |                                         | 1.00 (ref)                                  |          | 1.00 (ref)                             |         | 1.00 (ref)                                      |         |
| I prefer to buy food that carries a<br>nutritional claim on the front of<br>the package                                             | Agree                      | 0.530                                   | 0.817 (0.506,1.32)                          | 0.408    | 0.58 (0.36,0.92)                       | 0.021*  | 1.421 (0.80,2.52)                               | 0.230   |
|                                                                                                                                     | Neither agree nor disagree |                                         | 1.258 (0.821, 1.93)                         | 0.292    | 0.71 (0.47,1.08)                       | 0.113   | 1.764 (1.05,2.96)                               | 0.031*  |
|                                                                                                                                     | Disagree                   |                                         | 1.00 (ref)                                  |          | 1.00 (ref)                             |         | 1.00 (ref)                                      |         |
| The ingredients and nutritional<br>information on the back of the<br>package does not influence my<br>purchasing decisions          | Agree                      | 0.002**                                 | 0.82 (0.52, 1.30)                           | 0.399    | 0.52 (0.35, 0.78)                      | 0.001** | 1.58 (0.94, 2.65)                               | 0.088   |
|                                                                                                                                     | Neither agree nor disagree |                                         | 0.60 (0.40, 0.90)                           | 0.013*   | 0.58 (0.39, 0.86)                      | 0.007** | 1.02 (0.63, 1.66)                               | 0.929   |
|                                                                                                                                     | Disagree                   |                                         | 1.00 (ref)                                  |          | 1.00 (ref)                             |         | 1.00 (ref)                                      |         |

| Outcome                                                                         | Category                   | Overall<br>Significance<br><sup>a</sup> | Post hoc analysis                           |          |                                        |             |                                                 |             |
|---------------------------------------------------------------------------------|----------------------------|-----------------------------------------|---------------------------------------------|----------|----------------------------------------|-------------|-------------------------------------------------|-------------|
|                                                                                 |                            |                                         | High-Marginal vs. Very Low Food<br>Security |          | High-Marginal vs. Low Food<br>Security |             | Low Food Security vs. Very Low<br>Food Security |             |
|                                                                                 |                            |                                         | OR (95% CI)                                 | p-value  | OR (95% CI)                            | OR (95% CI) | p-value                                         | OR (95% CI) |
| The nutrition information offers<br>useful information about the<br>product     | Agree                      | 0.002**                                 | 3.26 (1.67, 6.37)                           | 0.001**  | 1.59 (0.77, 3.27)                      | 0.208       | 2.05 (0.95, 4.42)                               | 0.066       |
|                                                                                 | Neither agree nor disagree |                                         | 2.04 (1.01, 4.11)                           | 0.046*   | 1.08 (0.51, 2.28)                      | 0.843       | 1.89 (0.85, 4.12)                               | 0.117       |
|                                                                                 | Disagree                   |                                         | 1.00 (ref)                                  |          | 1.00 (ref)                             |             | 1.00 (ref)                                      |             |
| There is too much nutritional<br>information on food packaging                  | Agree                      | <0.001**                                | 0.44 (0.28, 0.70)                           | <0.001** | 0.57 (0.36, 0.92)                      | 0.020*      | 0.77 (0.44, 1.34)                               | 0.352       |
|                                                                                 | Neither agree nor disagree |                                         | 1.02 (0.68, 1.54)                           | 0.924    | 0.52 (0.36, 0.75)                      | 0.001**     | 1.95 (1.21, 3.15)                               | 0.007**     |
|                                                                                 | Disagree                   |                                         | 1.00 (ref)                                  |          | 1.00 (ref)                             |             | 1.00 (ref)                                      |             |
| I never read the nutritional<br>information and ingredients on<br>food packages | Agree                      | <0.001**                                | 0.48 (0.29, 0.79)                           | 0.004**  | 0.54 (0.34, 0.87)                      | 0.011*      | 0.86 (0.50, 1.58)                               | 0.678       |
|                                                                                 | Neither agree nor disagree |                                         | 0.44 (0.29, 0.66)                           | <0.001** | 0.33 (0.23, 0.48)                      | 0.001**     | 1.32 (0.83, 2.09)                               | 0.245       |
|                                                                                 | Disagree                   |                                         | 1.00 (ref)                                  |          | 1.00 (ref)                             |             | 1.00 (ref)                                      |             |
| How healthy would you say your<br>diet was?                                     | Healthy                    | 0.001**                                 | 2.17 (1.44, 3.27)                           | <0.001** | 1.31 (0.87, 1.95)                      | 0.195       | 1.66 (1.04, 2.67)                               | 0.034*      |
|                                                                                 | Unhealthy                  |                                         | 1.00 (ref)                                  |          | 1.00 (ref)                             |             | 1.00 (ref)                                      |             |

<sup>a</sup> Multinomial logistic regression model was adjusted for socio-demographics variables (age, household income, education and marital status)

\* p-value < 0.05; \*\* p-value < 0.01; OR = odds ratio; CI = confidence interval; 1.00 (ref) = reference level

Table S5: Response, by three categories of food security p-values and odds ratios of nutrition claim indicators

| Outcome<br>Rate the importance of the following : | Category                          | Overall<br>Significance<br><sup>a</sup> | Post hoc analysis                           |         |                                        |         |                                                 |         |
|---------------------------------------------------|-----------------------------------|-----------------------------------------|---------------------------------------------|---------|----------------------------------------|---------|-------------------------------------------------|---------|
|                                                   |                                   |                                         | High-Marginal vs. Very<br>Low Food Security |         | High-Marginal vs. Low<br>Food Security |         | Low Food Security vs. Very<br>Low Food Security |         |
|                                                   |                                   |                                         | OR (95% CI)                                 | p-value | OR (95% CI)                            | p-value | OR (95% CI)                                     | p-value |
| Low calorie (kilojoule)                           |                                   | 0.745                                   |                                             |         |                                        |         |                                                 |         |
|                                                   | Important                         |                                         | 0.91 (0.53, 1.56)                           | 0.740   | 0.84 (0.52, 1.37)                      | 0.493   | 1.08 (0.578, 2.02)                              | 0.806   |
|                                                   | Neither important nor unimportant |                                         | 0.80 (0.45, 1.42)                           | 0.450   | 0.99 (0.58, 1.70)                      | 0.980   | 0.81 (0.41, 1.59)                               | 0.534   |
| High protein                                      | Unimportant                       | 0.092                                   | 1.00 (ref)                                  |         | 1.00 (ref)                             |         | 1.00 (ref)                                      |         |
|                                                   | Important                         |                                         | 0.50 (0.26, 0.93)                           | 0.029** | 0.58 (0.34, 0.99)                      | 0.047*  | 0.87 (0.42, 1.80)                               | 0.706   |
|                                                   | Neither important nor unimportant |                                         | 0.57 (0.30, 1.09)                           | 0.090   | 0.72 (0.40, 1.27)                      | 0.251   | 0.8 (0.37, 1.72)                                | 0.567   |
| Low saturated fats                                | Unimportant                       | 0.860                                   | 1.00 (ref)                                  |         | 1.00 (ref)                             |         | 1.00 (ref)                                      |         |
|                                                   | Important                         |                                         | 0.74 (0.39, 1.41)                           | 0.352   | 0.85 (0.48, 1.52)                      | 0.582   | 0.87 (0.41, 1.84)                               | 0.707   |
|                                                   | Neither important nor unimportant |                                         | 0.69 (0.34, 1.41)                           | 0.303   | 0.80 (0.42, 1.53)                      | 0.501   | 0.86 (0.37, 1.98)                               | 0.716   |
| Low carbohydrates                                 | Unimportant                       | 0.055                                   | 1.00 (ref)                                  |         | 1.00 (ref)                             |         | 1.00 (ref)                                      |         |
|                                                   | Important                         |                                         | 0.56 (0.32, 0.99)                           | 0.046   | 0.82 (0.50, 1.32)                      | 0.409   | 0.69 (0.36, 1.32)                               | 0.256   |
|                                                   | Neither important nor unimportant |                                         | 0.87 (0.48, 1.57)                           | 0.638   | 1.17 (0.71, 1.95)                      | 0.527   | 0.73 (0.37, 1.46)                               | 0.381   |
| Low sodium                                        | Unimportant                       | 0.951                                   | 1.00 (ref)                                  |         | 1.00 (ref)                             |         | 1.00 (ref)                                      |         |
|                                                   | Important                         |                                         | 1.09 (0.55, 1.85)                           | 0.981   | 1.10 (0.64, 1.89)                      | 0.738   | 0.92 (0.46, 1.84)                               | 0.810   |
|                                                   | Neither important nor unimportant |                                         | 0.98 (0.51, 1.89)                           | 0.945   | 1.24 (0.68, 2.26)                      | 0.492   | 0.79 (0.37, 1.69)                               | 0.544   |
| Low sugar                                         | Unimportant                       | 0.672                                   | 1.00 (ref)                                  |         | 1.00 (ref)                             |         | 1.00 (ref)                                      |         |
|                                                   | Important                         |                                         | 1.23 (0.65, 2.33)                           | 0.521   | 1.3 (0.72, 2.33)                       | 0.380   | 0.95 (0.46, 1.95)                               | 0.884   |
|                                                   | Neither important nor unimportant |                                         | 1.45 (0.71, 2.97)                           | 0.313   | 1.58 (0.81, 3.08)                      | 0.178   | 0.92 (0.40, 2.08)                               | 0.834   |
|                                                   | Unimportant                       |                                         | 1.00 (ref)                                  |         | 1.00 (ref)                             |         | 1.00 (ref)                                      |         |

| Outcome<br>Rate the importance of the following : | Category                          | Overall<br>Significance<br><sup>a</sup> | Post hoc analysis                      |                 |                                             |                 |                                                 |                 |
|---------------------------------------------------|-----------------------------------|-----------------------------------------|----------------------------------------|-----------------|---------------------------------------------|-----------------|-------------------------------------------------|-----------------|
|                                                   |                                   |                                         | High-Marginal vs. Low<br>Food Security |                 | High-Marginal vs. Very<br>Low Food Security |                 | Low Food Security vs. Very<br>Low Food Security |                 |
|                                                   |                                   |                                         | OR (95% CI)                            | <i>p</i> -value | OR (95% CI)                                 | <i>p</i> -value | OR (95% CI)                                     | <i>p</i> -value |
| Low glycemc index                                 |                                   | 0.261                                   |                                        |                 |                                             |                 |                                                 |                 |
|                                                   | Important                         |                                         | 0.71 (0.41, 1.23)                      | 0.222           | 0.58 (0.34, 0.99)                           | 0.047           | 1.23 (0.62, 2.43)                               | 0.556           |
|                                                   | Neither important nor unimportant |                                         | 0.87 (0.49, 1.55)                      | 0.629           | 0.67 (0.38, 1.17)                           | 0.157           | 1.30 (0.64, 2.64)                               | 0.466           |
|                                                   | Unimportant                       |                                         | 1.00 (ref)                             |                 | 1.00 (ref)                                  |                 | 1.00 (ref)                                      |                 |
| Low preservatives                                 |                                   | 0.120                                   |                                        |                 |                                             |                 |                                                 |                 |
|                                                   | Important                         |                                         | 0.54 (0.26, 1.10)                      | 0.090           | 0.81 (0.33, 2.01)                           | 0.652           | 1.231 (0.50, 3.04)                              | 0.652           |
|                                                   | Neither important nor unimportant |                                         | 0.61 (0.29, 1.31)                      | 0.206           | 0.47 (0.22, 1.01)                           | 0.052           | 1.30 (0.50, 3.35)                               | 0.590           |
|                                                   | Unimportant                       |                                         | 1.00 (ref)                             |                 | 1.00 (ref)                                  |                 | 1.00 (ref)                                      |                 |

<sup>a</sup> Multinomial logistic regression model was adjusted for socio-demographics variables (age, household income, education and marital status)

\* *p*-value < 0.05; \*\* *p*-value < 0.01; OR = odds ratio; CI = confidence interval; 1.00 (ref) = reference level

Table S6: Response, by three categories of food security p-values and odds ratios of product attribute indicators

| Outcome       | Category                          | Overall<br>Significance <sup>a</sup> | Post hoc analysis                           |         |                                        |         |                                                 |            |
|---------------|-----------------------------------|--------------------------------------|---------------------------------------------|---------|----------------------------------------|---------|-------------------------------------------------|------------|
|               |                                   |                                      | High-Marginal vs. Very Low<br>Food Security |         | High-Marginal vs. Low Food<br>Security |         | Low Food Security vs. Very<br>Low Food Security |            |
|               |                                   |                                      | OR (95% CI)                                 | p-value | OR (95% CI)                            | p-value | OR (95% CI)                                     | p-value    |
| Nutrition     | Important                         | 0.021*                               | 1.00 (ref)                                  |         | 1.00 (ref)                             |         | 1.00 (ref)                                      |            |
|               | Neither important nor unimportant |                                      | 0.49 (0.30, 0.81)                           | 0.005** | 0.53 (0.34, 0.84)                      | 0.006** | 0.93 (0.54, 1.59)                               | 0.790      |
|               | Unimportant                       |                                      | 0.73 (0.28, 1.91)                           | 0.531   | 0.82 (0.33, 2.05)                      | 0.667   | 0.90 (0.30, 2.69)                               | 0.853      |
| Quality       | Important                         | 0.010*                               | 1.00 (ref)                                  |         | 1.00 (ref)                             |         | 1.00 (ref)                                      |            |
|               | Neither important nor unimportant |                                      | 0.40 (0.20, 0.81)                           | 0.011*  | 0.40 (0.21, 0.76)                      | 0.005** | 1.00 (0.47, 2.11)                               | 0.994      |
|               | Unimportant                       |                                      | 0.36 (0.10, 1.28)                           | 0.115   | 0.383 (0.12, 1.28)                     | 0.119   | 0.94 (0.25, 3.53)                               | 0.932      |
| Cost          | Important                         | 0.117                                | 1.00 (ref)                                  |         | 1.00 (ref)                             |         | 1.00 (ref)                                      | 1.00 (ref) |
|               | Neither important nor unimportant |                                      | 2.19 (1.08, 4.46)                           | 0.031*  | 1.41 (0.80, 2.49)                      | 0.234   | 1.55 (0.68, 3.55)                               | 0.298      |
|               | Unimportant                       |                                      | 0.61 (0.23, 1.64)                           | 0.327   | 0.74 (0.30, 1.82)                      | 0.507   | 0.83 (0.27, 2.60)                               | 0.749      |
| In season     | Important                         | 0.614                                | 1.14 (0.55, 2.38)                           | 0.720   | 1.47 (0.78, 2.77)                      | 0.229   | 0.78 (0.341, 1.77)                              | 0.545      |
|               | Neither important nor unimportant |                                      | 1.44 (0.65, 3.23)                           | 0.372   | 1.44 (0.72, 2.88)                      | 0.304   | 1.00 (0.41, 2.48)                               | 0.994      |
|               | Unimportant                       |                                      | 1.00 (ref)                                  |         | 1.00 (ref)                             |         | 1.00 (ref)                                      |            |
| Local product | Important                         | 0.205                                | 1.81 (0.98, 3.37)                           | 0.060   | 1.444 (0.784, 2.66)                    | 0.238   | 1.26 (0.62, 2.54)                               | 0.528      |
|               | Neither important nor unimportant |                                      | 2.28 (1.15, 4.52)                           | 0.018*  | 1.42 (0.73, 2.73)                      | 0.300   | 1.61 (0.74, 3.51)                               | 0.229      |
|               | Unimportant                       |                                      | 1.00 (ref)                                  |         | 1.00 (ref)                             |         | 1.00 (ref)                                      |            |
| Organic       | Important                         | 0.027*                               | 0.65 (0.42, 1.01)                           | 0.056   | 0.55 (0.36, 0.83)                      | 0.005** | 1.19 (0.70, 2.00)                               | 0.520      |
|               | Neither important nor unimportant |                                      | 1.01 (0.66, 1.56)                           | 0.963   | 0.73 (0.49, 1.08)                      | 0.116   | 1.39 (0.83, 2.33)                               | 0.205      |
|               | Unimportant                       |                                      | 1.00 (ref)                                  |         | 1.00 (ref)                             |         | 1.00 (ref)                                      |            |

| Outcome                                                                                                                          | Category                          | Overall<br>Significance <sup>a</sup> | Post hoc analysis                           |          |                                        |          |                                                 |         |
|----------------------------------------------------------------------------------------------------------------------------------|-----------------------------------|--------------------------------------|---------------------------------------------|----------|----------------------------------------|----------|-------------------------------------------------|---------|
|                                                                                                                                  |                                   |                                      | High-Marginal vs. Very Low<br>Food Security |          | High-Marginal vs. Low Food<br>Security |          | Low Food Security vs. Very<br>Low Food Security |         |
|                                                                                                                                  |                                   |                                      | OR (95% CI))                                | p-value  | OR (95% CI))                           | p-value  | OR (95% CI))                                    | p-value |
| Raw food (natural state)                                                                                                         | Important                         | 0.024*                               | 1.119 (0.71, 1.77)                          | 0.632    | 0.57 (0.35, 0.93)                      | 0.023    | 1.96 (1.10, 3.47)                               | 0.022*  |
|                                                                                                                                  | Neither important nor unimportant |                                      | 1.60 (0.98, 2.62)                           | 0.059    | 0.77 (0.47, 1.273)                     | 0.309    | 2.08 (1.13, 3.82)                               | 0.018*  |
|                                                                                                                                  | Unimportant                       |                                      | 1.00 (ref)                                  |          | 1.00 (ref)                             |          | 1.00 (ref)                                      |         |
| Unprocessed                                                                                                                      | Important                         | 0.521                                | 1.30 (0.77, 2.18)                           | 0.329    | 0.91 (0.54, 1.55)                      | 0.735    | 1.42 (0.76, 2.65)                               | 0.276   |
|                                                                                                                                  | Neither important nor unimportant |                                      | 1.59 (0.91, 2.78)                           | 0.101    | 0.95 (0.55, 1.65)                      | 0.862    | 1.67 (0.86, 3.26)                               | 0.131   |
|                                                                                                                                  | Unimportant                       |                                      | 1.00 (ref)                                  |          | 1.00 (ref)                             |          | 1.00 (ref)                                      |         |
| Convenience (pre-packaged to<br>save time) e.g. pre-cut<br>vegetables, pre-marinated<br>meats, bottle sauces<br>Australian grown | Important                         | <0.001**                             | 0.53 (0.34, 0.83)                           | 0.005**  | 0.40 (0.27, 0.61)                      | <0.001** | 1.31 (0.77, 2.22)                               | 0.325   |
|                                                                                                                                  | Neither important nor unimportant |                                      | 0.55 (0.36, 0.85)                           | 0.007    | 0.52 (0.35, 0.79)                      | 0.002**  | 1.06 (0.63, 1.78)                               | 0.833   |
|                                                                                                                                  | Unimportant                       |                                      | 1.00 (ref)                                  |          | 1.00 (ref)                             |          | 1.00 (ref)                                      |         |
|                                                                                                                                  | Important                         | 0.889                                | 1.36 (0.71, 2.60)                           | 0.359    | 1.09 (0.58, 2.04)                      | 0.794    | 1.25 (0.59, 2.65)                               | 0.564   |
|                                                                                                                                  | Neither important nor unimportant |                                      | 1.23 (0.59, 2.56)                           | 0.582    | 1.18 (0.58, 2.40)                      | 0.658    | 1.046 (0.45, 2.46)                              | 0.918   |
|                                                                                                                                  | Unimportant                       |                                      | 1.00 (ref)                                  |          | 1.00 (ref)                             |          | 1.00 (ref)                                      |         |
| Supermarket branded<br>(homebrand, Coles Select)                                                                                 | Important                         | <0.001**                             | 0.37 (0.23, 0.60)                           | <0.001** | 0.214 (0.131, 0.349)                   | <0.001** | 1.74 (0.97, 3.12)                               | 0.066   |
|                                                                                                                                  | Neither important nor unimportant |                                      | 0.83 (0.53, 1.28)                           | 0.391    | 0.475 (0.303, 0.743)                   | 0.001**  | 1.74 (0.99, 3.05)                               | 0.053   |
|                                                                                                                                  | Unimportant                       |                                      | 1.00 (ref)                                  |          | 1.00 (ref)                             |          | 1.00 (ref)                                      |         |

<sup>a</sup> Multinomial logistic regression model was adjusted for socio-demographics variables (age, household income, education and marital status)

\* p-value < 0.05; \*\* p-value < 0.01; OR = odds ratio; CI = confidence interval; 1.00 (ref) = reference level

Table S7: Response, by three categories of food security, frequencies and proportions for consumption behaviours

| Question                                                                             |                                                  | Serves    | High-Marginal Food Security | Low Food Security | Very Low Food Security |
|--------------------------------------------------------------------------------------|--------------------------------------------------|-----------|-----------------------------|-------------------|------------------------|
| On a typical day, how many serves <sup>a</sup> of the following foods would you eat? |                                                  |           |                             |                   |                        |
| Breakfast cereals                                                                    | 2/3 cup breakfast cereals, cooked oats           | 0         | 119 (18%)                   | 40 (20%)          | 41 (24%)               |
|                                                                                      | 2 weet-biscuits                                  | 1         | 476 (73%)                   | 143 (70%)         | 117 (68%)              |
|                                                                                      |                                                  | 2 or more | 56 (9%)                     | 21 (10%)          | 13 (8%)                |
| Milk, yoghurt, cheese and dairy alternatives                                         | 1 cup of milk or soy milk                        | 0         | 41 (6%)                     | 18 (9%)           | 17 (10%)               |
|                                                                                      | 2 slices of cheese                               | 1         | 358 (55%)                   | 115 (56%)         | 95 (56%)               |
|                                                                                      | 1 tub of yoghurt                                 | 2         | 194 (30%)                   | 49 (24%)          | 45 (26%)               |
|                                                                                      |                                                  | 3 or more | 58 (9%)                     | 22 (11%)          | 14 (8%)                |
| Bread                                                                                | 1 slice of bread                                 | 0         | 39 (6%)                     | 12 (6%)           | 20 (12%)               |
|                                                                                      | 1 crumpet or English muffin                      | 1         | 248 (38%)                   | 89 (44%)          | 77 (45%)               |
|                                                                                      |                                                  | 2         | 294 (45%)                   | 76 (37%)          | 58 (34%)               |
|                                                                                      |                                                  | 3 or more | 70 (11%)                    | 27 (13%)          | 16 (9%)                |
| Fruit (not including juice)                                                          | 1 medium banana, apple or orange                 | 0         | 27 (4%)                     | 11 (5%)           | 18 (11%)               |
|                                                                                      | 2 small kiwi fruit, apricots or plums            | 1         | 297 (46%)                   | 102 (50%)         | 81 (47%)               |
|                                                                                      | 1 cup canned fruit                               | 2         | 217 (33%)                   | 63 (31%)          | 47 (27%)               |
|                                                                                      | A handful of dried fruit (e.g. 4 apricot halves) | 3 or more | 110 (17%)                   | 28 (14%)          | 25 (15%)               |
| Fruit (juice)                                                                        | 1 cup fruit juice                                | 0         | 186 (29%)                   | 48 (24%)          | 54 (32%)               |
|                                                                                      |                                                  | 1         | 392 (60%)                   | 120 (59%)         | 86 (50%)               |
|                                                                                      |                                                  | 2 or more | 73 (11%)                    | 36 (18%)          | 31 (18%)               |

| Question                                                                             |                                                                                     | Serves    | High-Marginal Food Security | Low Food Security | Very Low Food Security |
|--------------------------------------------------------------------------------------|-------------------------------------------------------------------------------------|-----------|-----------------------------|-------------------|------------------------|
| On a typical day, how many serves <sup>a</sup> of the following foods would you eat? |                                                                                     |           |                             |                   |                        |
| Salad and vegetables (not including potato)                                          | 1 cup salad vegetables (e.g. lettuce, cucumber, tomato)                             | 0         | 15 (2%)                     | 14 (7%)           | 15 (9%)                |
|                                                                                      |                                                                                     | 1         | 289 (44%)                   | 100 (49%)         | 74 (43%)               |
|                                                                                      | ½ cup cooked or canned vegetables                                                   | 2         | 198 (30%)                   | 49 (24%)          | 45 (26%)               |
|                                                                                      |                                                                                     | 3         | 92 (14%)                    | 31 (15%)          | 25 (15%)               |
|                                                                                      |                                                                                     | 4 or more | 57 (9%)                     | 10 (5%)           | 12 (7%)                |
| Potato (not including chips)                                                         | ½ medium potato                                                                     | 0         | 35 (5%)                     | 21 (10%)          | 24 (14%)               |
|                                                                                      | ½ cup mashed potato                                                                 | 1         | 506 (78%)                   | 142 (70%)         | 115 (67%)              |
|                                                                                      |                                                                                     | 2 or more | 110 (17%)                   | 41 (20%)          | 32 (19%)               |
| Pasta, rice, or noodles                                                              | ½ cup cooked pasta or rice, noodles                                                 | 0         | 34 (5%)                     | 21 (10%)          | 19 (11%)               |
|                                                                                      |                                                                                     | 1         | 487 (75%)                   | 136 (67%)         | 116 (68%)              |
|                                                                                      |                                                                                     | 2 or more | 130 (20%)                   | 47 (23%)          | 36 (21%)               |
| Meat alternatives                                                                    | 1 cup baked beans, cooked legumes or tofu                                           | 0         | 64 (10%)                    | 30 (15%)          | 27 (16%)               |
|                                                                                      | 2 large eggs                                                                        | 1         | 499 (77%)                   | 147 (72%)         | 118 (69%)              |
|                                                                                      |                                                                                     | 2 or more | 88 (14%)                    | 27 (13%)          | 26 (15%)               |
| Fish                                                                                 | A cooked fish fillet about the size of an open hand (100g)                          | 0         | 81 (12%)                    | 26 (13%)          | 34 (20%)               |
|                                                                                      |                                                                                     | 1         | 488 (75%)                   | 144 (71%)         | 115 (67%)              |
|                                                                                      | One small can of fish (100g)                                                        | 2 or more | 82 (13%)                    | 34 (17%)          | 22 (13%)               |
| Poultry                                                                              | Cooked lean poultry such as chicken or turkey, about the size of an open hand (80g) | 0         | 38 (6%)                     | 11 (5%)           | 20 (12%)               |
|                                                                                      |                                                                                     | 1         | 497 (76%)                   | 141 (69%)         | 120 (70%)              |
|                                                                                      |                                                                                     | 2 or more | 116 (18%)                   | 52 (25%)          | 31 (18%)               |

| Question                                                                             |                                                                                                             | Serves    | High-Marginal Food Security | Low Food Security | Very Low Food Security |
|--------------------------------------------------------------------------------------|-------------------------------------------------------------------------------------------------------------|-----------|-----------------------------|-------------------|------------------------|
| On a typical day, how many serves <sup>a</sup> of the following foods would you eat? |                                                                                                             |           |                             |                   |                        |
| Red meat                                                                             | Cooked lean meat, about the size of a deck of playing cards (65g)                                           | 0         | 57 (9%)                     | 18 (9%)           | 20 (12%)               |
|                                                                                      |                                                                                                             | 1         | 472 (73%)                   | 142 (70%)         | 122 (71%)              |
|                                                                                      |                                                                                                             | 2 or more | 122 (19%)                   | 44 (22%)          | 29 (17%)               |
| Nuts and seeds                                                                       | A handful of nuts /seeds                                                                                    | 0         | 93 (14%)                    | 35 (17%)          | 46 (27%)               |
|                                                                                      |                                                                                                             | 1         | 450 (69%)                   | 123 (60%)         | 89 (52%)               |
|                                                                                      |                                                                                                             | 2 or more | 108 (17%)                   | 46 (23%)          | 36 (21%)               |
| Savoury snacks                                                                       | 2 slices of processed meat<br>12 hot chips<br>½ small packet of crisps (20g)                                | 0         | 96 (15%)                    | 28 (14%)          | 33 (19%)               |
|                                                                                      |                                                                                                             | 1         | 440 (68%)                   | 134 (66%)         | 102 (60%)              |
|                                                                                      |                                                                                                             | 2 or more | 115 (18%)                   | 42 (21%)          | 36 (21%)               |
| Sweet snacks                                                                         | 2 scoops ice cream<br>1 doughnut, slice of cake, muffin<br>½ regular bar of chocolate (25g)<br>2-3 biscuits | 0         | 55 (8%)                     | 25 (12%)          | 27 (16%)               |
|                                                                                      |                                                                                                             | 1         | 474 (73%)                   | 137 (67%)         | 107 (63%)              |
|                                                                                      |                                                                                                             | 2 or more | 122 (19%)                   | 42 (21%)          | 37 (22%)               |
|                                                                                      |                                                                                                             |           |                             |                   |                        |
| Water (including tea and coffee)                                                     | 1 cup (250ml)                                                                                               | 0         | 11 (2%)                     | 12 (6%)           | 15 (9%)                |
|                                                                                      |                                                                                                             | 1         | 103 (16%)                   | 47 (23%)          | 35 (20%)               |
|                                                                                      |                                                                                                             | 2         | 73 (11%)                    | 24 (12%)          | 21 (12%)               |
|                                                                                      |                                                                                                             | 3         | 88 (14%)                    | 24 (12%)          | 28 (16%)               |
|                                                                                      |                                                                                                             | 4 or more | 376 (58%)                   | 97 (48%)          | 72 (42%)               |

| Question                                                                             |                                                     | Serves    | High-Marginal Food Security | Low Food Security | Very Low Food Security |
|--------------------------------------------------------------------------------------|-----------------------------------------------------|-----------|-----------------------------|-------------------|------------------------|
| On a typical day, how many serves <sup>a</sup> of the following foods would you eat? |                                                     |           |                             |                   |                        |
| Additional drinks (not including alcohol)                                            | 1 can of soft drink (375ml)                         | 0         | 170 (26%)                   | 42 (21%)          | 43 (25%)               |
|                                                                                      | 2 cups of cordial (500ml)                           | 1         | 371 (57%)                   | 111 (54%)         | 82 (48%)               |
|                                                                                      | 1 can energy drink (330 ml)                         | 2         | 81 (12%)                    | 34 (17%)          | 28 (16%)               |
|                                                                                      | 2 cups of Sports drink (500 ml)                     | 3 or more | 29 (4%)                     | 17 (8%)           | 18 (11%)               |
| Alcohol                                                                              | 30 ml spirits                                       | 0         | 156 (24%)                   | 57 (28%)          | 57 (33%)               |
|                                                                                      | 60 ml fortified wine                                | 1         | 233 (36%)                   | 73 (36%)          | 61 (36%)               |
|                                                                                      | 100 ml wine                                         | 2         | 142 (22%)                   | 38 (19%)          | 34 (20%)               |
|                                                                                      | 425 ml light beer                                   | 3         | 53 (8%)                     | 16 (8%)           | 12 (7%)                |
|                                                                                      | 285 ml regular beer                                 | 4 or more | 67 (10%)                    | 20 (10%)          | 7 (4%)                 |
|                                                                                      | Small bottle of premix drink or ‘alco-pop’ (300 ml) |           |                             |                   |                        |

<sup>a</sup> Serves as defined by the Australian Dietary Guidelines
